# Supplementary material for: Controlling collective rotational patterns of magnetic rotors
Source: PubMed Central journal article supplement (PMC6795886; doi:10.1038/s41467-019-12665-w), 2019-10-16
Supplement: 41467_2019_12665_MOESM1_ESM.pdf [file 41467_2019_12665_MOESM1_ESM.pdf]

## Description of Additional Supplementary Files

**File name:** Supplementary Movie 1

**Description:** Single rotor in an alternating field with amplitude  $B = 6.0$  mT and frequency  $f = 1.0$  Hz. This corresponds to a dimensionless parameter  $\eta a^3 f / (mB) = 2.56 \times 10^{-3}$ .

**File name:** Supplementary Movie 2

**Description:** The stripe pattern for  $\alpha = 0.4$  and  $\beta = 0.3$  for a  $4 \times 4$  grid. Parameters for the simulation are  $\alpha = 0.2$  and  $\beta = 0.03$ .

**File name:** Supplementary Movie 3

**Description:** Quadrant pattern for  $\alpha = 6.0$  and  $\beta = 0.3$  for a  $4 \times 4$  grid. Black floats are tracer particles that are used to measure the flow field. Parameters for the simulation are  $\alpha = 6.0$  and  $\beta = 0.03$ .

**File name:** Supplementary Movie 4

**Description:** The quarter pattern for  $\alpha = 6.0$  and  $\beta = 0.03$  from simulations. The movie shows the rotational pattern (left), flow velocity amplitude (middle) and vorticity magnitude (right).

**File name:** Supplementary Movie 5

**Description:** The quarter pattern for  $\alpha = 6.0$  and  $\beta = 0.03$  from simulations with a  $20 \times 20$  grid.

**File name:** Supplementary Movie 6

**Description:** Flow field produced by the quarter pattern for  $\alpha = 6.0$  and  $\beta = 0.3$  for a  $4 \times 4$  grid. The movie shows the rotational pattern (left), flow velocity amplitude (centre) and vorticity magnitude (right).

**File name:** Supplementary Movie 7

**Description:** Demonstration of the pumping effect. The geometry and the dimensions of the rotors are the same as in the mixing experiment. The array is placed in a circular channel, and filled with water. When activated with the AC magnetic field the flow of up to  $0.2$  mm per second can be achieved in a channel with  $1 \text{ mm}^2$  cross-section. The video is played in real time, and the flow is evident from the motion of the particles (on the right hand side). The field is applied at  $30$  degrees with respect to the primary axes of the pattern.

**File name:** Supplementary Movie 8

**Description:** Demonstration of ink mixing using quarter rotational pattern. The system setup is as follows: the rotor size  $a = 1.5 \times 10^{-4}$  [m], the grid length  $\ell = 7.0 \times 10^{-4}$  [m], the magnetic moment  $m = 1.76 \times 10^{-8}$  [Am<sup>2</sup>], the external magnetic field strength  $B = 8.0$  [mT], the applied frequency  $f = 15$  [Hz] and glycerol is used for the fluid.
